# Supplementary material
Source: publisher figshare collection journal article supplement (https://acs.figshare.com/ndownloader/files/4393360)
Supplement: Supplementary file 1 [file 4393360]

# Visible light-driven $\text{Cu(II)-(Sr}_{1-y}\text{Na}_y\text{)(Ti}_{1-x}\text{Mo}_x\text{)O}_3$ photocatalysts based on the conduction band control and surface ion modification

Xiaoqing Qiu, Masahiro Miyauchi,\* Huogen Yu, Hiroshi Irie *and* Kazuhito Hashimoto\*

National Institute of Advanced Industrial Science and Technology, Tsukuba Central 5, 1-1-1 Higashi, Tsukuba, Ibaraki 305-8565, Japan. Research Center for Advanced Science and Technology, The University of Tokyo, 4-6-1 Komaba, Meguro-ku, Tokyo 153-8904, Japan. Graduate School of Engineering, The University of Tokyo, 7-3-1 Hongo, Bunkyo-ku, Tokyo 113-8656, Japan. Clean Energy Research Center, University of Yamanashi, 4-3-11 Takeda, Kofu, Yamanashi 400-8511, Japan.

\*Corresponding author: [m-miyauchi@aist.go.jp](mailto:m-miyauchi@aist.go.jp) [hashimoto@light.t.u-tokyo.ac.jp](mailto:hashimoto@light.t.u-tokyo.ac.jp)

## Supporting Online Materials

### 1 Elemental analysis

**Table S1.** The Composition of the sample derived from ICP and atomic absorption spectrophotometer analysis

| Sample                      | $(\text{Sr}_{1-y}\text{Na}_y)(\text{Ti}_{1-x}\text{Mo}_x)\text{O}_3$ |               |           |             |                |                 |
|-----------------------------|----------------------------------------------------------------------|---------------|-----------|-------------|----------------|-----------------|
|                             | I                                                                    | II            | III       | IV          | V <sup>b</sup> | VI <sup>c</sup> |
| Mo content (x) <sup>a</sup> | 0 (0)                                                                | 0.25% (0.25%) | 0.9% (1%) | 2.0% (2.5%) | 1.8% (2.5%)    | 1.9 % (2.5%)    |
| Na content (y)              | 0                                                                    | 0.06%         | 0.16%     | 0.25%       | 0.7%           | 0               |
| Molar ratio (Ti/Sr)         | 1.07                                                                 | 1.06          | 1.06      | 1.05        | 1.03           | 1.06            |

<sup>a</sup> the values given in parentheses are the initial ones.

<sup>b</sup> the sample obtained by the control experiment I

<sup>c</sup> the sample obtained by the control experiment II

Even though, Na and Mo co-doped  $\text{SrTiO}_3$  samples with the molar ratio  $\text{Na/Mo} = 2$  were not obtained. It is clear that the Na content in Sample V was greatly enhanced, compared to Sample IV, if 10 g NaCl was used as the additional Na source. The sample free of Na was also obtained by using  $\text{MoO}_3$  as starting material instead of  $\text{NaMoO}_4$ . Furthermore, the Mo contents in Sample V and VI were very close to that of Sample IV. The XRD patterns show that Sample V and VI were a single phase

with cubic perovskite structure (not shown). In other words, to a certain extent, the Na contents can be well controlled in the samples with a fixed Mo content, which provides the good opportunity to study the effects of Na ions on the photocatalytic activities.

## 2. XRD

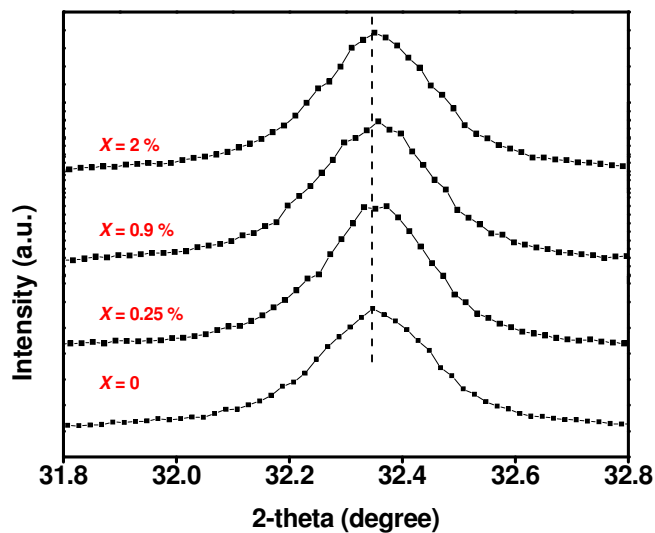

**Figure S1.** The enlarged peak (110) for  $(\text{Sr}_{1-y}\text{Na}_y)(\text{Ti}_{1-x}\text{Mo}_x)\text{O}_3$  at  $x = 0, 0.25\%, 0.9\%$ , and  $2.0\%$ .

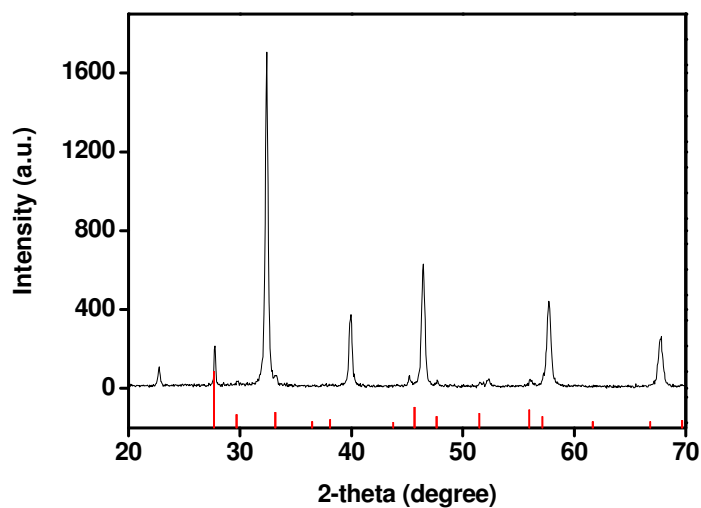

**Figure S2.** The XRD patterns of  $(\text{Sr}_{1-y}\text{Na}_y)(\text{Ti}_{1-x}\text{Mo}_x)\text{O}_3$  at  $x = 5\%$ . Vertical bars below the patterns represent the standard diffraction data from JCPDS file for bulk  $\text{SrMoO}_4$  (No. 08-0482)

### 3. TEM

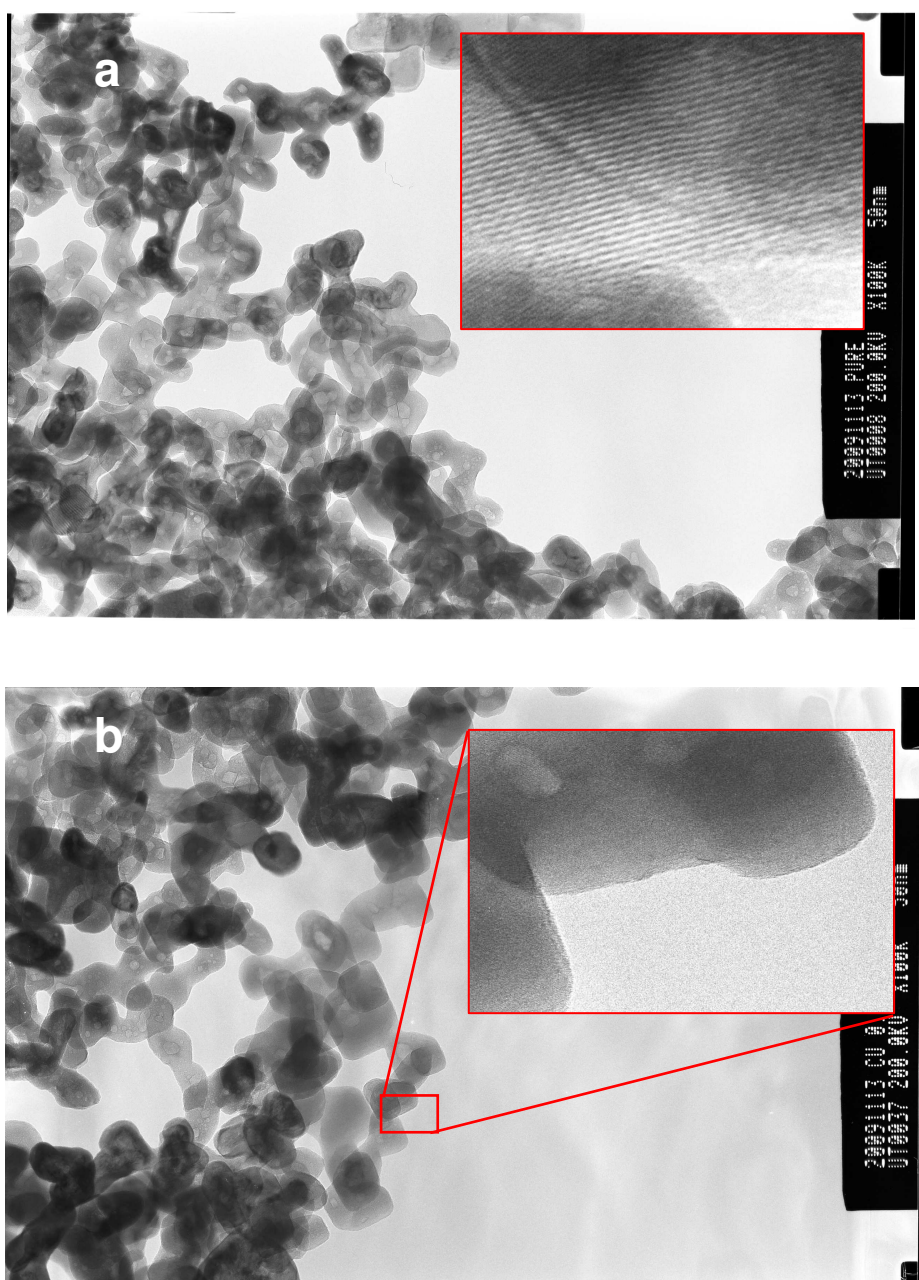

**Figure S3.** TEM images of a) non-doped  $\text{SrTiO}_3$  (a), and b)  $\text{Cu(II)-SrTiO}_3$

#### 4. XPS

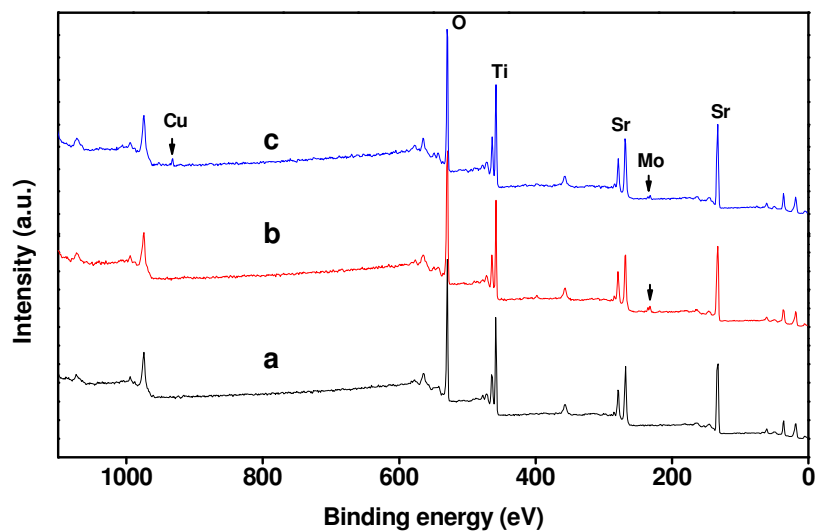

**Figure S4.** Full-scale XPS spectra of samples. (a) non-doped  $\text{SrTiO}_3$ , (b)  $(\text{Sr}_{1-y}\text{Na}_y)(\text{Ti}_{1-x}\text{Mo}_x)\text{O}_3$  at  $x = 2.0\%$ , (c)  $\text{Cu(II)}-(\text{Sr}_{1-y}\text{Na}_y)(\text{Ti}_{1-x}\text{Mo}_x)\text{O}_3$  at  $x = 2.0\%$ .

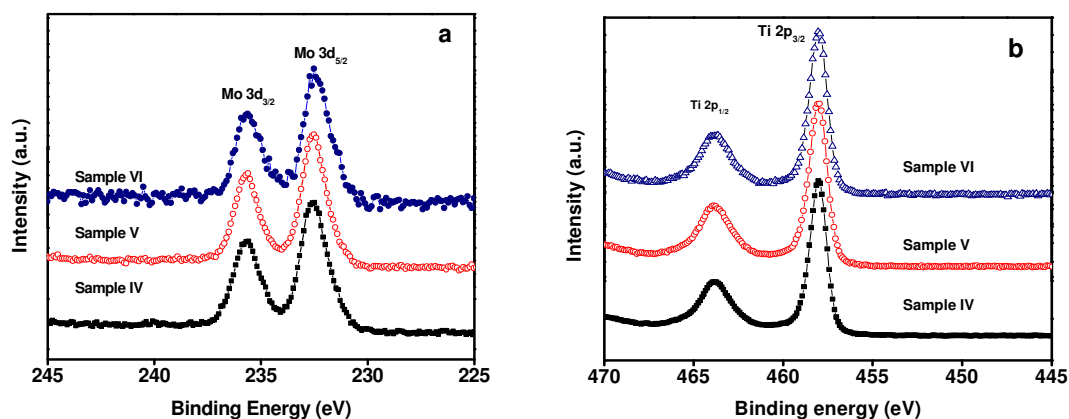

**Figure S5.** (a) Mo 3d core-level spectra of Sample IV, V and VI, (b) Ti 2p core-level spectra of Sample IV, V and VI.

There is no obvious difference in the chemical states of elements Mo and Ti in the Sample V and VI, compared to Sample IV.

## 5. UV-vis spectra

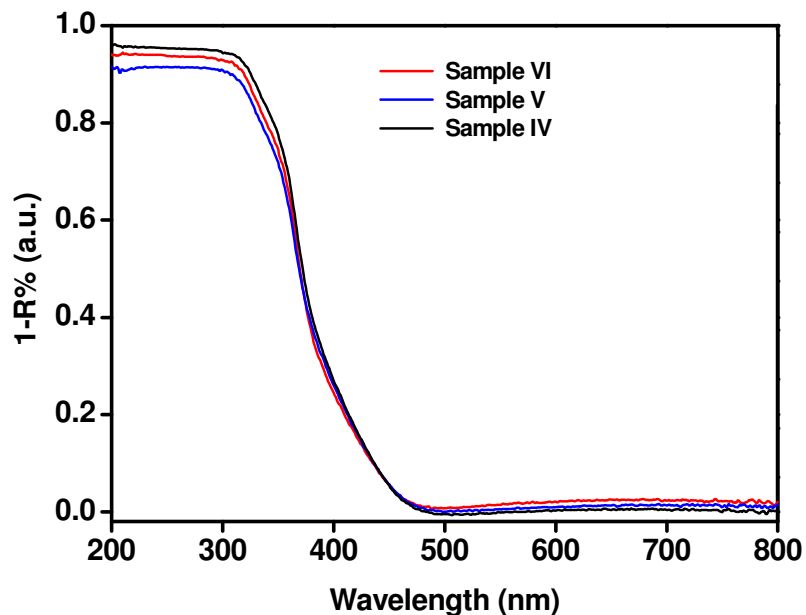

**Figure S6a .** UV-visible absorption spectra of Sample IV, V and VI.

The overlapping absorption edges of Sample IV, V and VI evidence their similar optical properties. This is because the Mo contents are comparable to each other

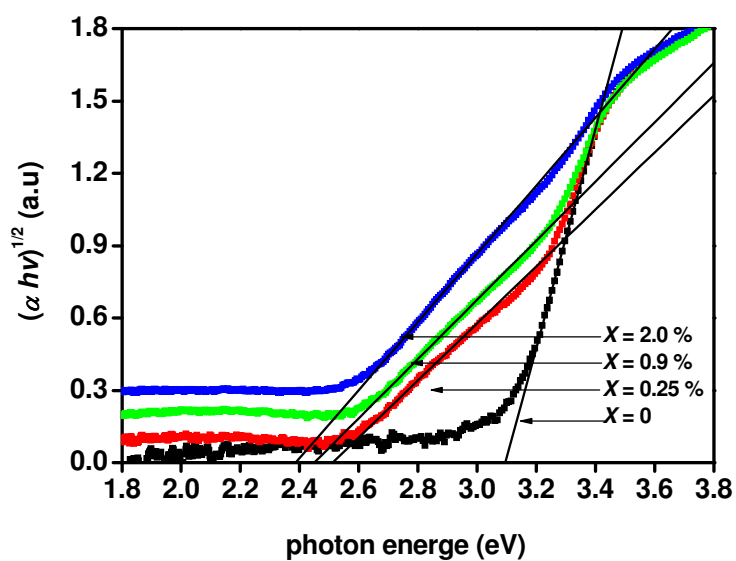

**Figure S6b.** The relationships between  $(\alpha hv)^{1/2}$  and photon energy of

(Sr<sub>1-y</sub>Na<sub>y</sub>)(Ti<sub>1-x</sub>Mo<sub>x</sub>)O<sub>3</sub> at  $x = 0, 0.25 \%, 0.9 \%, \text{ and } 2.0 \%$ , respectively.

SrTiO<sub>3</sub> is an indirect gap semiconductor. [Koffyberg, F. P.; Dwight, K.; Wold, A. *Solid State Commun.* **1979**, *30*, 433.] The optical band gap energies (E<sub>g</sub>) were calculated from the estimated from the corresponding absorption spectra by extrapolation of the linear portion of the  $(\alpha h\nu)^{1/2}$  curve versus the photon energy  $h\nu$  to  $(\alpha h\nu)^{1/2} = 0$ . As illustrated in the inset of Figure 6b, the band gap values are determined to be approximately 3.10, 2.52, 2.45, and 2.38 eV for (Sr<sub>1-y</sub>Na<sub>y</sub>)(Ti<sub>1-x</sub>Mo<sub>x</sub>)O<sub>3</sub> samples at  $x = 0, 0.25\%, 0.9\%, \text{ and } 2.0\%$ , respectively. From the DOS calculations, the change of the valence band position is ignored, then the decrease of the conduction band position could be estimated by change of the band gap energies. For example, the change of the CB position is approximately 0.7 eV for the (Sr<sub>1-y</sub>Na<sub>y</sub>)(Ti<sub>1-x</sub>Mo<sub>x</sub>)O<sub>3</sub> samples at  $x = 2 \%$  compared to that of SrTiO<sub>3</sub>.

## 6. BET

**Table S2.** Specific Surface Area Values

| Sample                               | I (x = 0) |             | II (x= 0.25%) |             | III (x = 0.9%) |             | IV (x= 2.0%) |             | V (x= 1.8%) |             | VI (x= 1.9%) |             |
|--------------------------------------|-----------|-------------|---------------|-------------|----------------|-------------|--------------|-------------|-------------|-------------|--------------|-------------|
|                                      | Bare      | With Cu(II) | Bare          | With Cu(II) | Bare           | With Cu(II) | Bare         | With Cu(II) | Bare        | With Cu(II) | Bare         | With Cu(II) |
| S <sub>BET</sub> (m <sup>2</sup> /g) | 24.3      | 25.3        | 22.8          | 23.7        | 26.2           | 27.3        | 24.7         | 26.5        | 20.4        | 21.2        | 24.6         | 25.4        |

All the samples had comparable specific surface areas. So, it can not account for the enhancement of the photocatalytic activities upon Cu(II) modification and Mo<sup>6+</sup> as well as Na<sup>+</sup> doping..

## 7. Irradiation light source

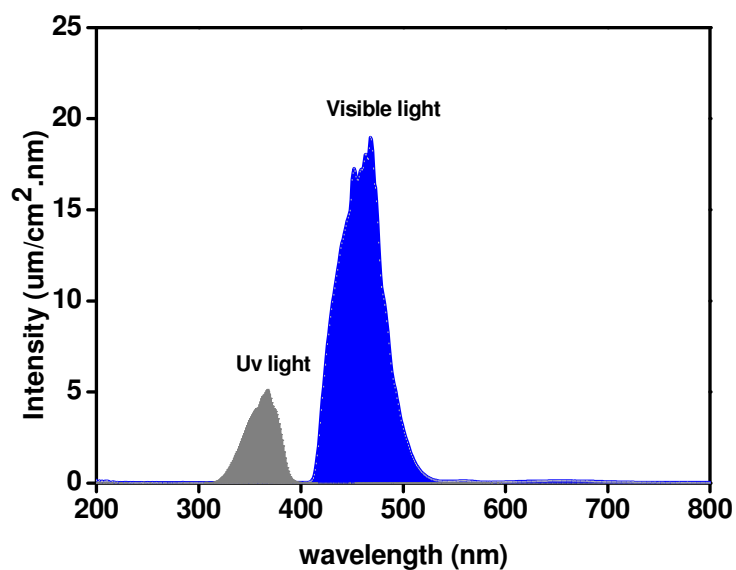

**Figure S7.** the light source for the visible light irradiation and UV irradiation

The wavelength of visible light is from 400 to 530 nm, and the light intensity is 1  $\text{mW}/\text{cm}^2$ . The UV light intensity was calibrated to control the same absorbed photon numbers as that of  $\text{Cu(II)-(Sr}_{1-y}\text{Na}_y)(\text{Ti}_{1-x}\text{Mo}_x)\text{O}_3$  at  $x = 2.0\%$  under visible light irradiation.

## 8. Photocatalytic activity

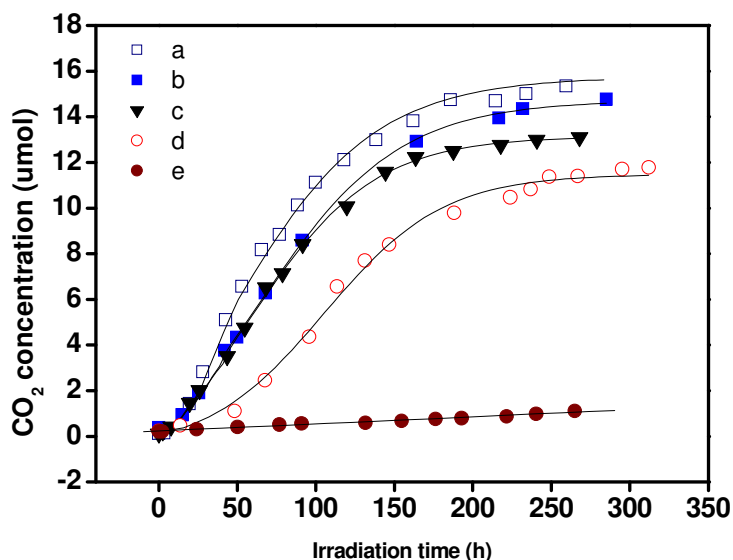

**Figure S8.** Comparative studies of CO<sub>2</sub> generation over different samples under visible light irradiation. a) Cu(II) modified Sample IV, i.e. Cu(II)-(Sr<sub>1-y</sub>Na<sub>y</sub>)(Ti<sub>1-x</sub>Mo<sub>x</sub>)O<sub>3</sub> at  $x = 2.0\%$  in the main text, b) Cu(II)-(Sr<sub>1-y</sub>Na<sub>y</sub>)(Ti<sub>1-x</sub>Mo<sub>x</sub>)O<sub>3</sub> at  $x = 5\%$ , i. e. Cu(II) modified the sample with minor impurity of SrMoO<sub>4</sub>. c) Cu(II) modified Sample V obtained by the control experiment I using NaCl as additional Na<sup>+</sup> source, d) Cu(II) modified Sample VI obtained by the control experiment II using MoO<sub>3</sub> as dopant source, e) Cu(II)-MoO<sub>3</sub>.

The highest photocatalytic activity was obtained over Cu(II)-(Sr<sub>1-y</sub>Na<sub>y</sub>)(Ti<sub>1-x</sub>Mo<sub>x</sub>)O<sub>3</sub> at  $x = 2.0\%$  (curve a). Further increasing the Mo content, the activity slightly decreased (curve b), due to the negative effects of impurity SrMoO<sub>4</sub> on the visible light activity. Concerning the relatively low Na contents in the samples, parallel experiments were performed under identical condition to get the various Na contents in the samples with a fixed Mo content to explore the effects on Na on the photocatalytic activities. By using NaCl as an additional Na source or MoO<sub>3</sub> as starting materials, the Na contents in the samples were successfully controlled. Our SrTiO<sub>3</sub> co-doped with Mo and Na sample exhibits the better activity than SrTiO<sub>3</sub> doped with Mo alone. But the activity decreased with the further increasing of Na content in the sample. One possible reason



for this is that Na ions are in favor of co-doping in SrTiO<sub>3</sub>, and is not effective for the photocatalytic activity.[ A. Fernandez, G. Lassaletta, V. M. Jimenez, A. Justo, A. R. Gonazalez-Elipé, J. M. Herrmann, H. Tahiri, Y. Ait-Ichou, *Appl. Catal. B* 1995, 7, 49. b] A. Fujishima, T. N. Rao, D. A. Tryk, *Electrochim. Acta* 2000, 45, 4683.] In the present study, optimum doping densities for Mo<sup>6+</sup> and Na<sup>+</sup> were 2.0 % and 0.25 %, respectively.

## 9. Details for the calculations of quantum efficiency

The calculation of quantum efficiency (QE) was conducted using the same procedure reported in the literatures [H. Irie, Y. Watanabe, K. Hashimoto, *J. Phys. Chem. B* 2003, 107, 5483. H. Irie, S. Miura, K. Kamiya, K. Hashimoto, *Chem. Phys. Lett.* 2008, 457, 202.].

Take Cu(II)-(Sr<sub>1-y</sub>Na<sub>y</sub>)(Ti<sub>1-x</sub>Mo<sub>x</sub>)O<sub>3</sub>( $x = 2.0\%$ ) for example. Under the visible light irradiation, the wavelength of visible light is from 400 to 530 nm, and the light intensity is 1 mW/cm<sup>2</sup>. The irradiating area is 5.5 cm<sup>2</sup>. Therefore, the absorption rate of incident photons ( $R_p^a$ ) was determined to be  $1.02 \times 10^{15}$  quanta·sec<sup>-1</sup>. As for CO<sub>2</sub> generation, assuming that the reaction from IPA to CO<sub>2</sub> is proceeded: C<sub>3</sub>H<sub>8</sub>O + 5H<sub>2</sub>O + 18h<sup>+</sup> → 3CO<sub>2</sub> + 18H<sup>+</sup>, that is, six photons are required to produce one CO<sub>2</sub> molecule. The CO<sub>2</sub> generation rate ( $R_{CO_2}$ ) was obtained from the slope of the CO<sub>2</sub> generation curve between the irradiation time of ca. 10 to 70 h in Figure S12. Using the conventional least-squares method,  $R_{CO_2}$  was determined to be 0.148 μmol·h<sup>-1</sup> (i.e,  $2.47 \times 10^{13}$  quanta·sec<sup>-1</sup>). Thus the QE for CO<sub>2</sub> generations were calculated using the following equation:  $QE = R_p^r / R_p^a = 6R_{CO_2} / R_p^a$

$$QE = 6 \times 2.47 \times 10^{13} \text{ quanta} \cdot \text{sec}^{-1} / 1.02 \times 10^{15} \text{ quanta} \cdot \text{sec}^{-1} = 14.5\%$$

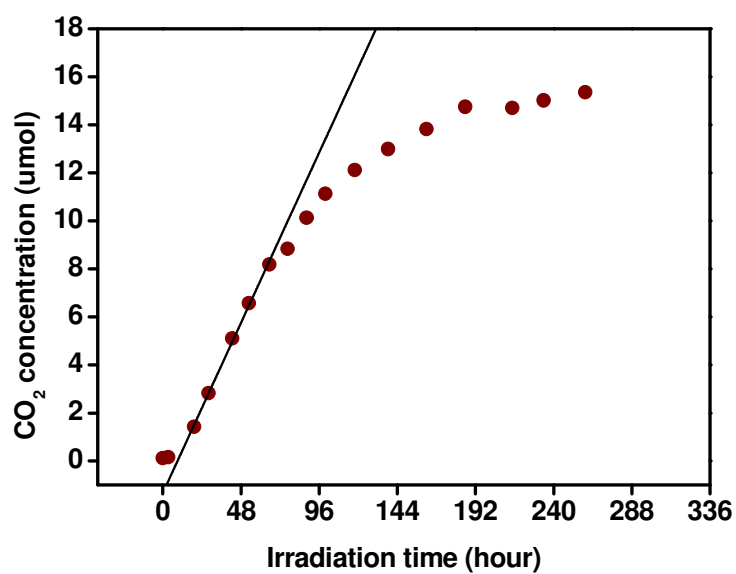

**Figure S9.** The CO<sub>2</sub> generation curve over Cu(II)-(Sr<sub>1-y</sub>Na<sub>y</sub>)(Ti<sub>1-x</sub>Mo<sub>x</sub>)O<sub>3</sub> at  $x = 2.0\%$  under visible light irradiation. The CO<sub>2</sub> generation rate ( $R_{CO_2}$ ) was obtained from the slope of the CO<sub>2</sub> generation curve between the irradiation time of ca. 10 to 70 h.
